# Supplementary material
Source: MDPI journal article supplement (https://www.mdpi.com/2072-4292/16/3/591)
Supplement: s1 [file s1 › remotesensing-2821060-supplementary.pdf]

## Supplementary Tables

for

*Review*

# Challenges and Limitations of Remote Sensing Applications in Northern Peatlands: Present and Future Prospects

**Supplementary Table S1.** List of the applications and grouping themes in the systematic literature search for review (for Figure 4).

| Grouped Theme | C Fluxes and Storage       | Fire Dynamics            | Hydrology                           | Mapping and Monitoring       | Peatland Degradation | Restoration and Management Monitoring | Vegetation                         | Other                      |
|---------------|----------------------------|--------------------------|-------------------------------------|------------------------------|----------------------|---------------------------------------|------------------------------------|----------------------------|
| Applications  | - CO2 Gas Fluxes           | - Fire Risk Reduction    | - Predict Nutrients                 | - Change Detection           | Peatland Degradation | - Restoration Monitoring              | - Vegetation Phenology             | - Hyperspectral Validation |
|               | - Peatland Productivity    | - Wildfire Dynamics      | - Hydrologic services               | - Peatland Monitoring        |                      | - Peatland Restoration Management     | - Vegetation Analysis and Modeling | - Measuring Surface Albedo |
|               | - CO2 fluxes               | - Wildfire Vulnerability | - Hydrology and Vegetation Dynamics | - Peatland Mapping           |                      | - Peatland Classification             | - Vegetation Classification        |                            |
|               | - Methane Emission Mapping | - and Monitoring         | - WTD Mapping                       | - Peatland Degradation       |                      |                                       | - Peatland Productivity            |                            |
|               | - Carbon Fluxes            |                          |                                     | - Condition Assessment       |                      |                                       | - Peatland Vegetation              |                            |
|               | - GHG Emission Mapping     |                          |                                     | - Classification and Mapping |                      |                                       | - Vegetation Dynamic               |                            |
|               |                            |                          |                                     |                              |                      |                                       |                                    |                            |

|                            |                               |                           |
|----------------------------|-------------------------------|---------------------------|
| - Methane<br>Fluxs         | - Mapping<br>Microtopography  | - Vegetation<br>Mapping   |
| - Carbon<br>Stocks         | - Peatland<br>Microtopography | - Respiration<br>Modeling |
| - Peat Depth<br>Estimation | - Change<br>Assessment        | and<br>Upscaling          |

**Supplementary Table S2.** The total number and percentage of studies that used different remote sensing platforms (such as satellites, airborne, in-situ, or mixed sensors) in northern peatlands over the years 2017-2022.

| Year  | Satellite | Airborne | UAV   | In-situ | Mixed | Total | %     |
|-------|-----------|----------|-------|---------|-------|-------|-------|
| 2017  | 5         | 5        | 1     | 4       | 3     | 18    | 13.1% |
| 2018  | 7         | 2        | 3     | 0       | 4     | 16    | 11.7% |
| 2019  | 12        | 5        | 6     | 4       | 6     | 33    | 24.1% |
| 2020  | 8         | 4        | 2     | 3       | 4     | 21    | 15.3% |
| 2021  | 10        | 5        | 4     | 1       | 5     | 25    | 18.2% |
| 2022  | 8         | 7        | 3     | 3       | 3     | 24    | 17.5% |
| Total | 50        | 28       | 19    | 15      | 25    | 137   | 100%  |
| %     | 36.5%     | 20.4%    | 13.9% | 10.9%   | 18.2% | 100%  | -     |

**Supplementary Table S3.** The total number and percentage of studies that applied remote sensing-based applications in northern peatlands over the years 2017-2022.

| Year  | C Fluxes and Storage | Fire Dynamics | Hydrology | Mapping and Monitoring | Peatland Degradation | Restoration and Management Monitoring | Vegetation | Other | Total | %    |
|-------|----------------------|---------------|-----------|------------------------|----------------------|---------------------------------------|------------|-------|-------|------|
| 2017  | 2                    | 1             | 5         | 5                      | 0                    | 1                                     | 4          | 0     | 18    | 13%  |
| 2018  | 2                    | 1             | 3         | 7                      | 0                    | 1                                     | 2          | 0     | 16    | 12%  |
| 2019  | 3                    | 0             | 1         | 13                     | 1                    | 7                                     | 6          | 2     | 33    | 24%  |
| 2020  | 1                    | 1             | 2         | 9                      | 1                    | 3                                     | 3          | 1     | 21    | 15%  |
| 2021  | 7                    | 0             | 4         | 9                      | 1                    | 1                                     | 3          | 0     | 25    | 18%  |
| 2022  | 4                    | 4             | 2         | 7                      | 0                    | 2                                     | 5          | 0     | 24    | 18%  |
| Total | 19                   | 7             | 17        | 50                     | 3                    | 15                                    | 23         | 3     | 137   | 100% |
| %     | 14%                  | 5%            | 12%       | 36%                    | 2%                   | 11%                                   | 17%        | 2%    | 100%  | -    |

**Supplementary Table S4.** The total number and percentage of studies that used satellite included in the SLR over the years 2017-2022.

| Year  | C Fluxes and Storage | Fire Dynamics | Hydrology | Mapping and Monitoring | Peatland Degradation | Restoration and Management Monitoring | Vegetation | Other | Total | %    |
|-------|----------------------|---------------|-----------|------------------------|----------------------|---------------------------------------|------------|-------|-------|------|
| 2017  | 1                    | 0             | 0         | 3                      | 0                    | 0                                     | 1          | 0     | 5     | 10%  |
| 2018  | 1                    | 1             | 1         | 3                      | 0                    | 1                                     | 0          | 0     | 7     | 14%  |
| 2019  | 3                    | 0             | 1         | 3                      | 1                    | 3                                     | 1          | 0     | 12    | 24%  |
| 2020  | 0                    | 1             | 2         | 5                      | 0                    | 0                                     | 0          | 0     | 8     | 16%  |
| 2021  | 1                    | 0             | 1         | 6                      | 1                    | 0                                     | 1          | 0     | 10    | 20%  |
| 2022  | 1                    | 1             | 2         | 1                      | 0                    | 1                                     | 2          | 0     | 8     | 16%  |
| Total | 7                    | 3             | 7         | 21                     | 2                    | 5                                     | 5          | 0     | 50    | 100% |
| %     | 14%                  | 6%            | 14%       | 42%                    | 4%                   | 10%                                   | 10%        | 0%    | 100%  | -    |

**Supplementary Table S5.** The total number and percentage of studies that used airborne included in the SLR over the years 2017-2022.

| Year  | C Fluxes and Storage | Fire Dynamics | Hydrology | Mapping and Monitoring | Peatland Degradation | Restoration and Management Monitoring | Vegetation | Other | Total | %    |
|-------|----------------------|---------------|-----------|------------------------|----------------------|---------------------------------------|------------|-------|-------|------|
| 2017  | 0                    | 1             | 2         | 1                      | 0                    | 0                                     | 1          | 0     | 5     | 18%  |
| 2018  | 1                    | 0             | 0         | 1                      | 0                    | 0                                     | 0          | 0     | 2     | 7%   |
| 2019  | 0                    | 0             | 0         | 2                      | 0                    | 1                                     | 1          | 1     | 5     | 18%  |
| 2020  | 1                    | 0             | 0         | 2                      | 0                    | 0                                     | 0          | 1     | 4     | 14%  |
| 2021  | 1                    | 0             | 2         | 1                      | 0                    | 0                                     | 1          | 0     | 5     | 18%  |
| 2022  | 1                    | 3             | 0         | 3                      | 0                    | 0                                     | 0          | 0     | 7     | 25%  |
| Total | 4                    | 4             | 4         | 10                     | 0                    | 1                                     | 3          | 2     | 28    | 100% |
| %     | 14%                  | 14%           | 14%       | 36%                    | 0%                   | 4%                                    | 11%        | 7%    | 100%  | -    |

**Supplementary Table S6.** The total number and percentage of studies that used UAV included in the SLR over the years 2017-2022.

| Year  | C Fluxes and Storage | Fire Dynamics | Hydrology | Mapping and Monitoring | Peatland Degradation | Restoration and Management Monitoring | Vegetation | Other | Total | %    |
|-------|----------------------|---------------|-----------|------------------------|----------------------|---------------------------------------|------------|-------|-------|------|
| 2017  | 0                    | 0             | 1         | 0                      | 0                    | 0                                     | 0          | 0     | 1     | 5%   |
| 2018  | 0                    | 0             | 0         | 2                      | 0                    | 0                                     | 1          | 0     | 3     | 16%  |
| 2019  | 0                    | 0             | 0         | 3                      | 0                    | 3                                     | 0          | 0     | 6     | 32%  |
| 2020  | 0                    | 0             | 0         | 0                      | 0                    | 2                                     | 0          | 0     | 2     | 11%  |
| 2021  | 1                    | 0             | 1         | 1                      | 0                    | 1                                     | 0          | 0     | 4     | 21%  |
| 2022  | 1                    | 0             | 0         | 1                      | 0                    | 1                                     | 0          | 0     | 3     | 16%  |
| Total | 2                    | 0             | 2         | 7                      | 0                    | 7                                     | 1          | 0     | 19    | 100% |
| %     | 11%                  | 0%            | 11%       | 37%                    | 0%                   | 37%                                   | 5%         | 0%    | 100%  | -    |

**Supplementary Table S7.** The total number and percentage of studies that used in-situ included in the SLR over the years 2017-2022.

| Year  | C Fluxes and Storage | Fire Dynamics | Hydrology | Mapping and Monitoring | Peatland Degradation | Restoration and Management Monitoring | Vegetation | Other | Total | %    |
|-------|----------------------|---------------|-----------|------------------------|----------------------|---------------------------------------|------------|-------|-------|------|
| 2017  | 1                    | 0             | 1         | 0                      | 0                    | 0                                     | 2          | 0     | 4     | 27%  |
| 2018  | 0                    | 0             | 0         | 0                      | 0                    | 0                                     | 0          | 0     | 0     | 0%   |
| 2019  | 0                    | 0             | 0         | 1                      | 0                    | 0                                     | 3          | 0     | 4     | 27%  |
| 2020  | 0                    | 0             | 0         | 1                      | 0                    | 0                                     | 2          | 0     | 3     | 20%  |
| 2021  | 1                    | 0             | 0         | 0                      | 0                    | 0                                     | 0          | 0     | 1     | 7%   |
| 2022  | 1                    | 0             | 0         | 0                      | 0                    | 0                                     | 2          | 0     | 3     | 20%  |
| Total | 3                    | 0             | 1         | 2                      | 0                    | 0                                     | 9          | 0     | 15    | 100% |
| %     | 20%                  | 0%            | 7%        | 13%                    | 0%                   | 0%                                    | 60%        | 0%    | 100%  | -    |

**Supplementary Table S8.** The total number and percentage of studies that used mixed or multiple platforms included in the SLR over the years 2017-2022.

| Year  | C Fluxes and Storage | Fire Dynamics | Hydrology | Mapping and Monitoring | Peatland Degradation | Restoration and Management Monitoring | Vegetation | Other | Total | %    |
|-------|----------------------|---------------|-----------|------------------------|----------------------|---------------------------------------|------------|-------|-------|------|
| 2017  | 0                    | 0             | 1         | 1                      | 0                    | 1                                     | 0          | 0     | 3     | 12%  |
| 2018  | 0                    | 0             | 2         | 1                      | 0                    | 0                                     | 1          | 0     | 4     | 16%  |
| 2019  | 0                    | 0             | 0         | 4                      | 0                    | 0                                     | 1          | 1     | 6     | 24%  |
| 2020  | 0                    | 0             | 0         | 1                      | 1                    | 1                                     | 1          | 0     | 4     | 16%  |
| 2021  | 3                    | 0             | 0         | 1                      | 0                    | 0                                     | 1          | 0     | 5     | 20%  |
| 2022  | 0                    | 0             | 0         | 2                      | 0                    | 0                                     | 1          | 0     | 3     | 12%  |
| Total | 3                    | 0             | 3         | 10                     | 1                    | 2                                     | 5          | 1     | 25    | 100% |
| %     | 12%                  | 0%            | 12%       | 40%                    | 4%                   | 8%                                    | 20%        | 4%    | 100%  | -    |
